# Supplementary material for: Application of expanded genetic analysis in the diagnosis of familial hypercholesterolemia in patients with very early-onset coronary artery disease
Source: Springer Nature journal article supplement (doi:10.1186/s12967-018-1737-7), 2018-12-01
Supplement: MOESM1 [file 16330176]

## **Additional file**

### **Application of expanded genetic analysis in the diagnosis of familial hypercholesterolemia in patients with very early-onset coronary artery disease**

Ye-Xuan Cao<sup>1\*</sup>, Na-Qiong Wu<sup>1\*</sup>, Di Sun<sup>1</sup>, Hui-Hui Liu<sup>1</sup>, Jing-Lu Jin<sup>1</sup>, Sha Li,<sup>1</sup> Yuan-Lin Guo<sup>1</sup>, Cheng-Gang Zhu<sup>1</sup>, Qiu-Ting Dong<sup>1</sup>, Geng Liu<sup>1</sup>, Qian Dong,<sup>1</sup> Jian-Jun Li<sup>1</sup>

\* The first two authors contributed equally.

**Table S1.** Simon Broome diagnostic criteria for familial hypercholesterolemia

| <b>Diagnosis</b> | <b>Criteria</b>                                                                                                                                  |
|------------------|--------------------------------------------------------------------------------------------------------------------------------------------------|
| Definite FH      | Cholesterol >7.5 mmol/L or LDL-cholesterol >4.9 mmol/L in adult                                                                                  |
|                  | Cholesterol >6.7 mmol/L or LDL-cholesterol >4.0 mmol/L in a child under 16 years of age                                                          |
|                  | PLUS                                                                                                                                             |
|                  | Tendon xanthomas in patient or a 1st degree relative (parent, sibling, child), or in a 2nd degree relative (grand parent, uncle, aunt)           |
|                  | OR                                                                                                                                               |
|                  | DNA based evidence of a functional <i>LDLR</i> , <i>PCSK9</i> and <i>APOB</i> mutation                                                           |
| Probable FH      | Cholesterol >7.5 mmol/L or LDL-cholesterol >4.9 mmol/L in adult                                                                                  |
|                  | Cholesterol >6.7 mmol/L or LDL-cholesterol >4.0 mmol/L in a child under 16 years of age                                                          |
|                  | PLUS                                                                                                                                             |
|                  | Family History of myocardial infarction (MI) before 50 years of age in a 2nd degree relative or below age 60 in a 1st degree relative            |
|                  | OR                                                                                                                                               |
|                  | Family history of raised total cholesterol - >7.5 mmol/L in adult 1st or 2nd degree relative or >6.7 mmol/L in a child or sibling aged <16 years |

**Table S2.** Dutch Lipid Clinic Network Clinical Criteria for familial hypercholesterolemia

| <b>Criteria</b>                                                                                                                                                                                                                 | <b>Points</b> |
|---------------------------------------------------------------------------------------------------------------------------------------------------------------------------------------------------------------------------------|---------------|
| <b><i>Family history</i></b>                                                                                                                                                                                                    |               |
| First-degree relative with known premature (men: <55 years; women: <60 years) coronary artery disease or vascular disease, or first-degree relative with known LDL-C level above the 95th percentile by age, gender for country | 1             |
| First-degree relative with tendinous xanthomata and/or arcus cornealis, or children aged less than 18 years with LDL-C level above the 95th percentile by age, gender for country                                               | 2             |
| <b><i>Clinical history</i></b>                                                                                                                                                                                                  |               |
| Patient with premature (men: <55 years; women: <60 years) coronary artery disease                                                                                                                                               | 2             |
| Patient with premature (men: <55 years; women: <60 years) cerebrovascular or peripheral vascular disease                                                                                                                        | 1             |
| <b><i>Physical examination</i></b>                                                                                                                                                                                              |               |
| Tendinous xanthomata                                                                                                                                                                                                            | 6             |
| Arcus cornealis prior to age 45 years                                                                                                                                                                                           | 4             |
| <b><i>LDL-C levels</i></b>                                                                                                                                                                                                      |               |
| LDL-C $\geq$ 8.5 mmol/l (~330 mg/dl)                                                                                                                                                                                            | 8             |
| LDL-C 6.5–8.4 mmol/l (~250–329 mg/dl)                                                                                                                                                                                           | 5             |
| LDL-C 5.0–6.4 mmol/l (~190–249 mg/dl)                                                                                                                                                                                           | 3             |
| LDL-C 4.0–4.9 mmol/l (~155–189 mg/dl)                                                                                                                                                                                           | 1             |
| <b><i>DNA analysis</i></b>                                                                                                                                                                                                      |               |
| Causative mutation in the <i>LDLR</i> , <i>ApoB</i> or <i>PCSK9</i> gene                                                                                                                                                        | 8             |

>8 points Definite FH

6–8 points Probable FH

3–5 points Possible FH

0–2 points Unlikely FH

**Table S3.** Summary of pathogenic/likely pathogenic mutations in CAD patients

| <b>Gene</b>       | <b>Nucleotide change</b>              | <b>Effect on protein</b>              | <b>PMID/Novel</b>  | <b>No. of patient</b> |
|-------------------|---------------------------------------|---------------------------------------|--------------------|-----------------------|
| <i>LDLR</i>       | c.1158delC                            | p.Asp386fs                            | Novel              | 1                     |
| <i>LDLR</i>       | c.1474G>A                             | p.Asp492Asn                           | 9763532            | 1                     |
| <i>LDLR</i>       | c.1724T>C                             | p.Leu575Pro                           | Novel              | 1                     |
| <i>LDLR</i>       | c.1747C>T                             | p.His583Tyr                           | 22698793           | 1                     |
| <i>LDLR</i>       | c.1765G>A                             | p.Asp589Asn                           | 16250003           | 1                     |
| <i>LDLR</i>       | c.1A>T                                | p.Met1Leu                             | 8831933            | 1                     |
| <i>LDLR</i>       | c.2026G>C                             | p.Gly676Arg                           | 26892515           | 1                     |
| <i>LDLR</i>       | c.2389G>A                             | p.Val797Met                           | 23375686           | 1                     |
| <i>LDLR</i>       | c.313+3A>T                            | -                                     | Novel              | 1                     |
| <i>LDLR</i>       | c.510delC                             | p.Asp172Thrfs*34                      | 22881376           | 1                     |
| <i>LDLR</i>       | c.510delC                             | p.Asp170fs                            | Novel              | 1                     |
| <i>LDLR</i>       | c.532G>T                              | p.Asp178Tyr                           | 16389549           | 1                     |
| <i>LDLR</i>       | c.670G>T                              | p.Asp224Tyr                           | Novel              | 1                     |
| <i>LDLR</i>       | c.694+4T>G                            | -                                     | Novel              | 1                     |
| <i>LDLR</i>       | c.971G>A                              | p.Gly324Asp                           | Novel              | 1                     |
| <i>LDLR homo</i>  | c.974G>A                              | p.Cys325Tyr                           | 21865347           | 1                     |
| <i>LDLR homo</i>  | c.1879G>A                             | p.Ala627Thr                           | 23375686           | 1                     |
| <i>LDLR homo</i>  | c.1448G>A                             | p.Trp483Ter                           | 7903864            | 1                     |
| <i>LDLR homo</i>  | c.1206delC                            | p.Phe403Serfs*10                      | 15241806           | 1                     |
| <i>APOB</i>       | c.1594C>T                             | p.Arg532Trp                           | Novel              | 1                     |
| <i>APOB</i>       | c.6110T>C                             | p.Ile2037Thr                          | Novel              | 1                     |
| <i>APOB</i>       | c.7223C>T                             | p.Ser2408Phe                          | Novel              | 1                     |
| <i>APOB</i>       | c.8267G>T                             | p.Gly2756Val                          | Novel              | 1                     |
| <i>APOB</i>       | c.8462C>T                             | p.Pro2821Leu                          | 18710658           | 1                     |
| <i>APOB</i>       | c.889C>T                              | p.Arg297Cys                           | Novel              | 1                     |
| <i>APOB</i>       | c.9164A>G                             | p.Asn3055Ser                          | Novel              | 1                     |
| <i>PCSK9</i>      | c.10G>A                               | p.Val4Ile                             | 17316651           | 1                     |
| <i>PCSK9</i>      | c.644G>A                              | p.Arg215His                           | 24404629           | 1                     |
| <i>STAP1</i>      | c.596A>G                              | p.Asn199Ser                           | Novel              | 1                     |
| <i>LDLR, LDLR</i> | c.665G>T; 2054C>T                     | p.Cys222Phe; p.Pro685Leu              | 25741868; 1830890  | 1                     |
| <i>LDLR, LDLR</i> | c.292G>A; c.1864G>A                   | p.Gly98Ser; p.Asp622Asn               | 16250003; 15701167 | 1                     |
| <i>LDLR, LDLR</i> | c.1432G>A; c.2054C>T                  | p.Gly478Arg; p.Pro685Leu              | 23064986; 23155708 | 1                     |
| <i>LDLR, LDLR</i> | c.665G>T; c.1747C>T                   | p.Cys222Phe; p.His583Thr              | 2574186; 7903864   | 1                     |
| <i>LDLR, LDLR</i> | c.769C>T; c.1765G>A                   | p.Arg257Trp; p.Asp589Asn              | 11462246; 16250003 | 1                     |
| <i>LDLR, LDLR</i> | c.1885_1886insCA;<br>c.1889G>C        | p.Phe629Serfs*37;<br>p.Ser630Tyr      | Novel; Novel       | 1                     |
| <i>LDLR, LDLR</i> | c.1884_1885insGA;<br>c.1888_1889insAC | p.Phe629Aspfs*37;<br>p.Ser630Asnfs*36 | Novel; Novel       | 1                     |

|                        |                                                 |                                                      |                 |   |
|------------------------|-------------------------------------------------|------------------------------------------------------|-----------------|---|
| <i>LDLR, LDLR</i>      | c.2336_2337delGA;<br>c.2337_2338insTTTT;        | p.Gly779Glufs*2;<br>p.Gly779fs;                      | Novel; Novel    | 1 |
| <i>LDLR, APOB</i>      | <i>LDLR</i> c.682G>T;<br><i>APOB</i> c.2870T>C  | <i>LDLR</i> p.Glu228Ter;<br><i>APOB</i> p.Ile957Thr  | 19843101; Novel | 1 |
| <i>LDLR, APOB</i>      | <i>LDLR</i> c.670G>T;<br><i>APOB</i> c.10748A>T | <i>LDLR</i> p.Asp224Tyr;<br><i>APOB</i> p.His3583Leu | Novel; Novel    | 1 |
| <i>LDLR,<br/>PCSK9</i> | <i>LDLR</i> c.1879G>A;<br><i>PCSK9</i> c.626C>T | <i>LDLR</i> p.Ala627Thr;<br><i>PCSK9</i> p.Pro209Leu | 23375686; Novel | 1 |

**Table S4.** Summary of variants of unknown significance in CAD patients.

| <b>Gene</b>  | <b>Nucleotide change</b> | <b>Effect on protein</b> |
|--------------|--------------------------|--------------------------|
| <i>APOB</i>  | c.10835A>G               | p.Ala3612Gly             |
| <i>APOB</i>  | c.12016G>A               | p.Val4006Ile             |
| <i>APOB</i>  | c.1342G>A                | p.Ala448Thr              |
| <i>APOB</i>  | c.13663G>A               | p.Ala4555Thr             |
| <i>APOB</i>  | c.288G>T                 | p.Glyln96His             |
| <i>APOB</i>  | c.4163G>A                | p.Arg1388His             |
| <i>APOB</i>  | c.4556A>G                | p.Asn1519Ser             |
| <i>APOB</i>  | c.7331G>A                | p.Arg2444His             |
| <i>APOB</i>  | c.7565G>A                | p.Arg2522Gln             |
| <i>APOB</i>  | c.7724A>T                | p.Lys2575Ile             |
| <i>APOB</i>  | c.7729A>C                | p.Met2577Leu             |
| <i>PCSK9</i> | c.1487G>A                | p.Arg496Gln              |
| <i>PCSK9</i> | c.1954A>G                | p.Asn652Ala              |
| <i>APOE</i>  | c.149G>A                 | p.Arg50His               |

**Table S5.** Biochemical and clinical characteristics of patients in relation to DLCN Scores.

| All<br>(N=105)                            | DLCN <3<br>N=28 | DLCN 3-5<br>N=49 | DLCN 6-8<br>N=12 | DLCN >8<br>N=16 | P for trend |
|-------------------------------------------|-----------------|------------------|------------------|-----------------|-------------|
| Age, years                                | 32.64 ± 3.08    | 33.14 ± 4.03     | 32.25 ± 3.62     | 25.13 ± 9.37    | 0.001       |
| Male, n (%)                               | 28 (100)        | 48 (98.0)        | 12 (100)         | 11 (68.8)       | 0.097       |
| BMI, kg/(m <sup>2</sup> )                 | 34.87 ± 37.65   | 28.56 ± 3.87     | 26.76 ± 3.46     | 21.71±5.83      | 0.212       |
| Family history of premature CAD,<br>n (%) | 0 (0)           | 10 (20.4)        | 6 (50.0)         | 4 (25.0)        | 0.002       |
| History of MI, n (%)                      | 17 (60.7)       | 23 (46.9)        | 6 (50.0)         | 6 (37.5)        | 0.483       |
| Currently smoking, n (%)                  | 21 (75.0)       | 38 (77.6)        | 7 (58.3)         | 4 (25.0)        | 0.001       |
| Alcohol drinker, n (%)                    | 13 (61.9)       | 17 (38.9)        | 3 (25.0)         | 3 (18.8)        | 0.038       |
| Hypertension, n (%)                       | 12 (42.9)       | 26 (51.3)        | 6 (50.0)         | 2 (12.5)        | 0.051       |
| DM, n (%)                                 | 7 (25.0)        | 8 (16.3)         | 2 (16.7)         | 0 (0)           | 0.196       |
| Statin, n (%)                             | 21 (75.0)       | 39 (79.6)        | 9 (75.0)         | 12 (75.0)       | 0.958       |
| TG, mmol/L                                | 1.70 ± 0.68     | 2.03 ± 0.89      | 1.63 ± 0.56      | 1.47 ± 0.98     | 0.070       |
| TC, mmol/L                                | 3.97 ± 0.98     | 6.60 ± 10.29     | 6.22 ± 1.52      | 11.41 ± 3.95    | 0.016       |
| HDL-C, mmol/L                             | 0.95 ± 0.33     | 0.92 ± 0.20      | 0.87 ± 0.30      | 0.73 ± 0.23     | 0.053       |
| LDL-C, mmol/L                             | 3.66 ± 0.16     | 4.7 ± 0.68       | 6.78 ± 0.97      | 12.07±4.71      | <0.001      |
| Xanthoma, n (%)                           | 0 (0)           | 0 (0)            | 0 (0)            | 12 (75)         | <0.001      |
| % of mutation                             | 3 (10.7)        | 14 (28.6%)       | 11(91.7%)        | 9 (56.3)        |             |
| <i>LDLR</i> , n (%)                       | 1 (3.6)         | 5 (10.2)         | 6 (50.0)         | 3 (18.8)        | <0.001      |
| <i>APOB</i> , n (%)                       | 2 (7.1)         | 4 (8.2)          | 1 (8.3)          | 0 (0)           | 0.107       |
| <i>PCSK9</i> , n (%)                      | 0 (0)           | 1 (2.0)          | 1 (8.3)          | 0 (0)           | 0.001       |
| <i>STAP1</i> , n (%)                      | 0 (0)           | 1 (2.0)          | 0 (0)            | 0 (0)           | 0.001       |
| <i>LDLR</i> Homozygote, n (%)             | 0 (0)           | 0 (0)            | 0 (0)            | 4 (25.0)        | 0.001       |
| Two mutations, n (%)                      | 0 (0)           | 3 (6.1)          | 3 (25.0)         | 5 (56.3)        | 0.001       |

Data are expressed as mean ± SD, or n (%). BMI: body mass index; CAD: coronary artery disease; MI: myocardial infarction; DM: diabetes mellitus; TG: triglyceride; TC: total cholesterol; HDL-C: high-density lipoprotein cholesterol; LDL-C: low-density lipoprotein cholesterol; *LDLR*: low-density lipoprotein receptor; *APOB*: Apolipoprotein B; *PCSK9*: proprotein convertase subtilisin/Kexin type 9; *STAP1*: Signal-transducing adaptor protein 1.

**Table S6.** Plasma LDL-C levels stratified by genetic mutations in the patients with very early-onset CAD.

| <b>Mutation Type</b>   | <b>Number of patients</b> | <b>LDL-C, mmol/L</b> |
|------------------------|---------------------------|----------------------|
| All                    | 105                       | 5.77 ± 3.36          |
| FH mutation-negative   | 65                        | 4.60 ± 1.62          |
| FH mutation-positive   | 40                        | 7.65 ± 4.49          |
| <i>LDLR</i>            | 15                        | 7.46 ± 4.93          |
| <i>APOB</i>            | 7                         | 4.72 ± 1.05          |
| <i>PCSK9</i>           | 2                         | 5.71 ± 1.00          |
| <i>STAP1</i>           | 1                         | 4.67                 |
| <i>LDLR</i> Homozygote | 4                         | 13.88 ± 4.72         |
| Two mutations          | 11                        | 8.21 ± 3.23          |

Data are expressed as mean ± SD, or n (%). LDL-C: low-density lipoprotein cholesterol; CAD: coronary artery disease; *LDLR*: low-density lipoprotein receptor; *APOB*: Apolipoprotein B; *PCSK9*: proprotein convertase subtilisin/Kexin type 9; *STAP1*: Signal-transducing adaptor protein 1.



**Table S7.** Percentage participants with early-onset CAD meeting clinical and genetic criteria for FH diagnosis based on different initial LDL-C levels.

| <b>LDL-C</b>      | <b>No.</b> | <b>Simon Broome Criteria<br/>(Possible and Definite)</b> | <b>Dutch Lipid Clinic Criteria<br/>(Probable and Definite)</b> | <b>Genetic Study</b> |
|-------------------|------------|----------------------------------------------------------|----------------------------------------------------------------|----------------------|
| ≥ 4.9 (190 mg/dL) | 43         | 18 (41.8%)                                               | 26 (60.5%)                                                     | 27 (62.8%)           |
| ≥ 4.6 (178 mg/dL) | 49         | 18 (36.7%)                                               | 27 (55.1%)                                                     | 30 (61.2%)           |
| ≥ 4.4 (170 mg/dL) | 58         | 18 (31.0%)                                               | 27 (46.6%)                                                     | 31 (53.4%)           |
| ≥ 4.0 (155 mg/dL) | 73         | 18 (24.7%)                                               | 28 (38.3%)                                                     | 37 (50.7%)           |
| ≥ 3.8 (145 mg/dL) | 77         | 18 (23.4%)                                               | 28 (36.4%)                                                     | 38 (49.4%)           |
| ≥ 3.4 (130mg/dL)  | 105        | 18 (17.1%)                                               | 28 (26.7%)                                                     | 40 (38.1%)           |

Data are expressed as n (%). LDL-C: low-density lipoprotein cholesterol.

**Figure S1.** Plasma LDL-C levels stratified by genetic mutations in the patients with very early-onset CAD.

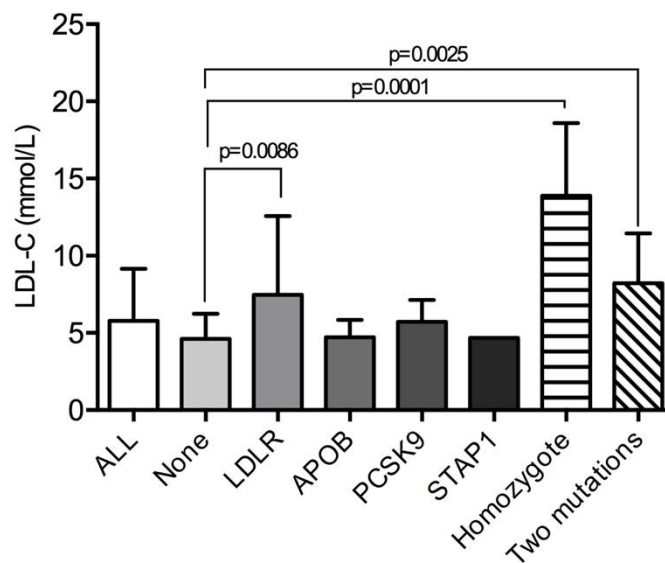

LDL-C: low-density lipoprotein cholesterol; CAD: coronary artery disease. *LDLR*: low-density lipoprotein receptor; *APOB*: Apolipoprotein B; *PCSK9*: proprotein convertase subtilisin/Kexin type 9; *STAP1*: Signal-transducing adaptor protein 1.

**Figure S2.** Percentage participants with CAD meeting clinical and genetic criteria for FH diagnosis.

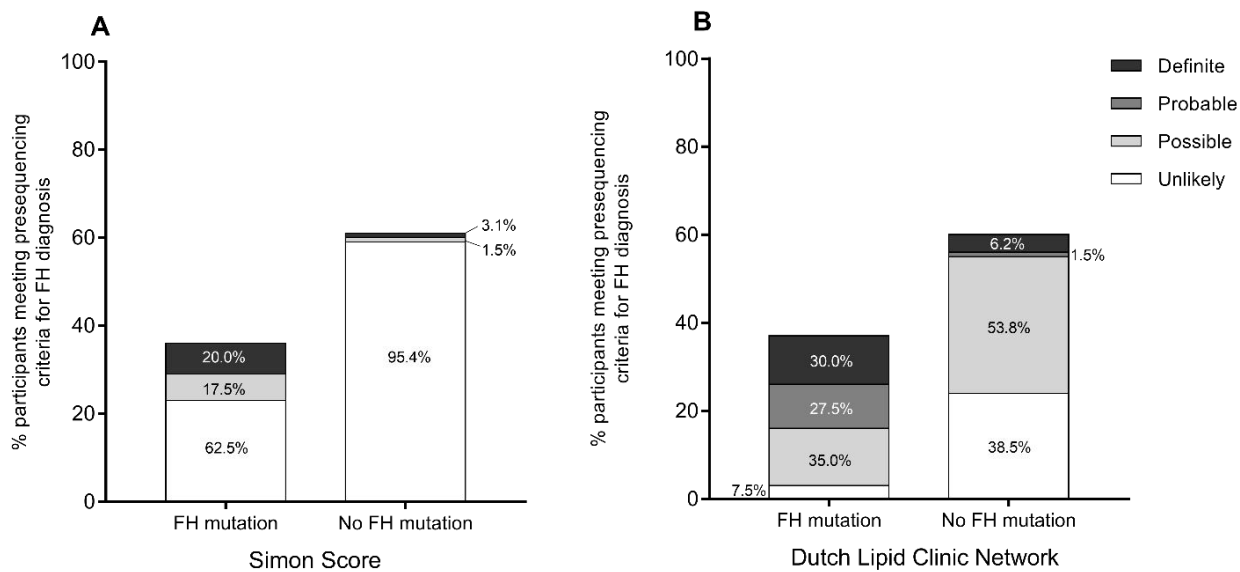

CAD: coronary artery disease; FH: familial hypercholesterolemia.

**Figure S3.** Receiver operating characteristic curves of LDL-C (n=105).

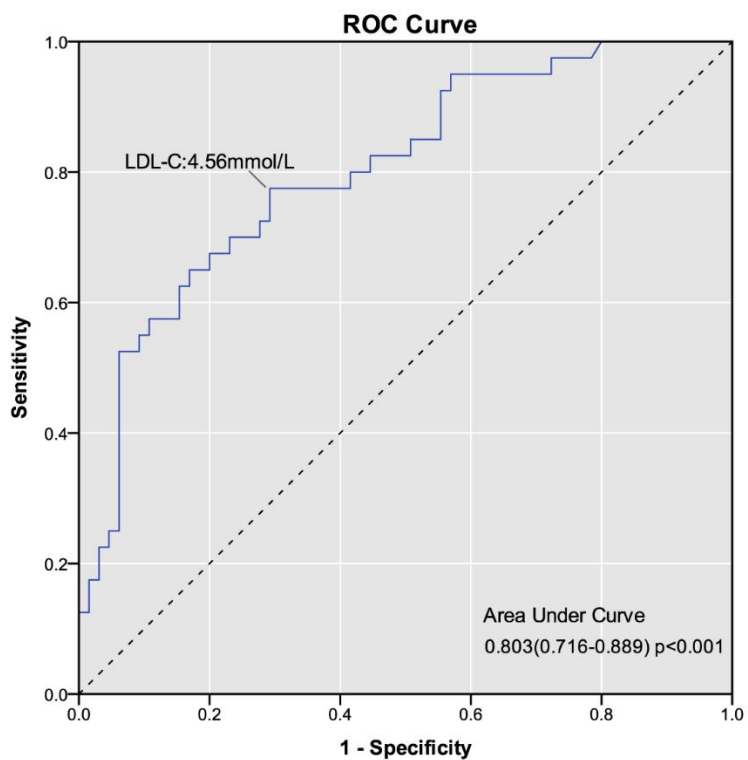

LDL-C: low-density lipoprotein cholesterol. Sensitivity=0.775, Specificity=0.708.
